# Supplementary material
Source: publisher site journal article supplement (https://www.dovepress.com/article/577208)
Supplement: Supplementary file 1 [file 577208%20Supplementary%20Material.pdf]

# Supplementary Figure 1. ROC curve of $\Delta DE_{DB}$ at T2 for predicting postoperative hypoxemia, with performance metrics at the optimal cutoff (0.215cm).

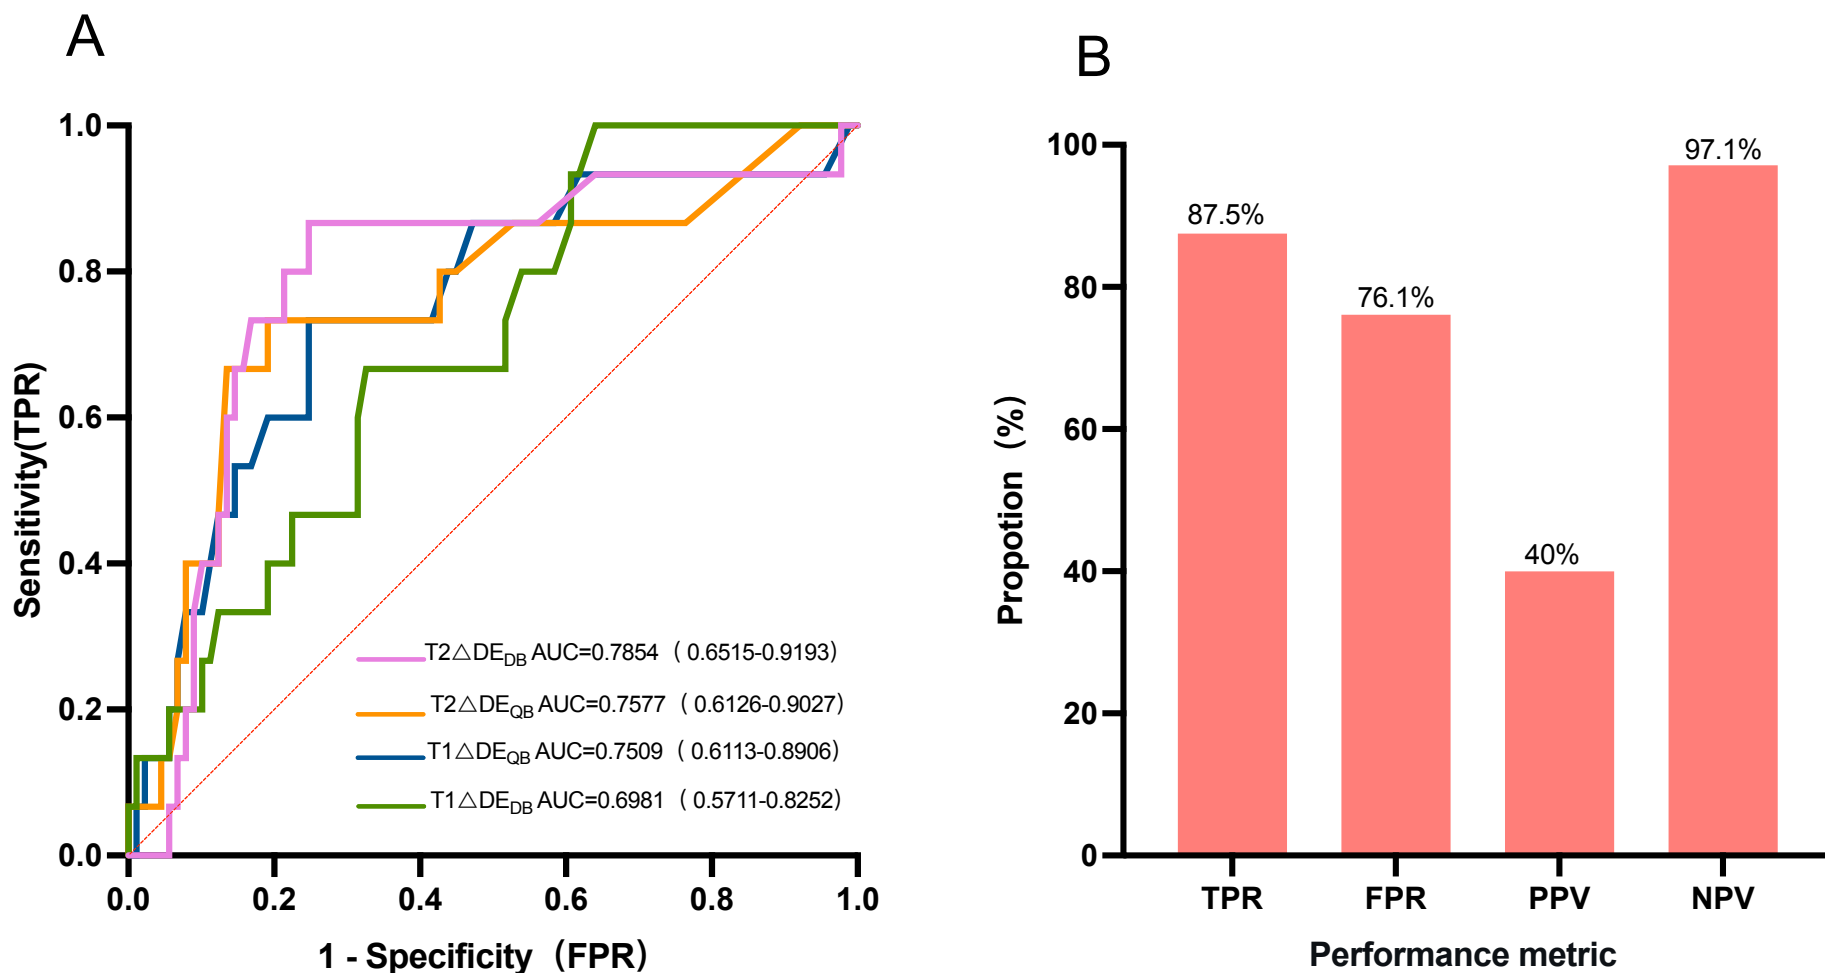

(A) ROC curve showing the predictive value of  $\Delta DE_{DB}$  at T2 for postoperative hypoxemia. The area under the curve (AUC) was 0.785 (95% CI: 0.652–0.919). (B) Performance metrics at the optimal cutoff value of 0.215 cm (determined by Youden's index). TPR, true positive rate (sensitivity); FPR, false positive rate (1 – specificity); PPV, positive predictive value; NPV, negative predictive value.

**Abbreviations:** T1: 10 min after extubation; T2: 30 min after extubation;  $\Delta DE_{DB}$ , the change in diaphragmatic excursion during deep breathing from preoperative baseline;  $\Delta DE_{QB}$ , the change in diaphragmatic excursion quiet breathing from preoperative baseline.
